# Supplementary material for: Dual recombinase action in the normal and neoplastic mammary gland epithelium
Source: PubMed Central journal article supplement (PMC8531329; doi:10.1038/s41598-021-00231-8), 2021-10-21

**Supplementary Table 1:** PCR primer sets to genotype the various transgenes and genetically engineered alleles as well as to determine Flp and Cre-mediated recombination events.

| Transgene / Allele                      | Primer #                           | Sequence (5' - 3')                | bp                                |
|-----------------------------------------|------------------------------------|-----------------------------------|-----------------------------------|
| MMTV-Flp                                | 2546                               | CCT GGA ACG GCA TCA TCA GC        | 275                               |
|                                         | 2128                               | CTC CCA TTC ATC AGT TCC ATA GG    |                                   |
|                                         | 2127                               | AGT GAT AGA GCT CTT GCC TAG C     | 570                               |
|                                         | 2525                               | CGT TGT AAG GGA TGA TGG TGA ACT   |                                   |
| <i>Jak1<sup>fl/wt</sup></i>             | 2614                               | CCA TCA GCA CTA GCT GAG GTT C     | 285 (fl-neo)                      |
|                                         | ( <i>Flp</i> recombined)           | 2615                              | CAC AAT GTA GCA AGA CCA AGC CAT G |
| <i>Jak1<sup>fl(-neo)null</sup></i>      | 2717                               | GTA ACT AGC AGA AGG TCT GAT CTG   | >900 (fl-neo)                     |
|                                         | ( <i>Flp+Cre</i> recombined, null) | 2615                              | CAC AAT GTA GCA AGA CCA AGC CAT G |
| CAG-LSL-GFP                             | 2004                               | GGC TCT AGA GCC TCT GCT AAC C     | ~270                              |
|                                         | 2211                               | GCC ATT GGG ATA TAT CAA CGG TG    |                                   |
| MMTV-neu                                | 1259                               | TTT CCT GCA GCA GCC TAC GC        | 590                               |
|                                         | 1260                               | CGG AAC CCA CAT CAG GCC           |                                   |
| <i>Rosa26<sup>CAG-FSF-GFP</sup></i>     | 2729                               | CCC AAA GTC GCT CTG AGT TGT TAT C | 550 (wt)                          |
|                                         | 2730                               | GAA GGA GCG GGA GAA ATG GAT ATG   | 350 (mu)                          |
|                                         | 2731                               | CCA GGC GGG CCA TTT ACC GTA AG    |                                   |
| <i>FSF-Kras<sup>G12D</sup></i>          | 2528                               | CAC CAG CTT CGG CTT CCT ATT       | 270 (wt)                          |
|                                         | 2529                               | AGC TAA TGG CTC TCA AAG GAA TGT A | 350 (mu)                          |
|                                         | 2530                               | GCG AAG AGT TTG TCC TCA ACC       |                                   |
| <i>Kras<sup>G12D</sup></i>              | 2600                               | GTC TTT CCC CAG CAC AGT GCA G     | 310 (wt)                          |
|                                         | ( <i>Flp</i> recombined)           | 2602                              | GTT TTG TAG CAG CTA ATG GCT CTC   |
| <i>Trp53<sup>R172H</sup></i>            | 2598                               | AGC CTG CCT AGC TTC CTC AGG       | 290 (wt)                          |
|                                         | 2599                               | CTT GGA GAC ATA GCC ACA CTG       | 330 (mu)                          |
| <i>Rosa26<sup>CAG-FSF-CreERT2</sup></i> | 2534                               | GAA TGT GCC TGG CTA GAG ATC       | 190                               |
|                                         | 2535                               | GCA GAT TCA TCA TGC GGA           |                                   |
| <i>Rosa26<sup>CAG-FSF-CreERT2</sup></i> | 2729                               | CCC AAA GTC GCT CTG AGT TGT TAT C | 550 (wt)                          |
|                                         | 2730                               | GAA GGA GCG GGA GAA ATG GAT ATG   | ~420 (mu)                         |
|                                         | 2731                               | CCA GGC GGG CCA TTT ACC GTA AG    |                                   |
| <i>Rosa26<sup>CAG-CreERT2</sup></i>     | 2723                               | GTT CGG CTT CTG GCG TGT           | 490                               |
|                                         | ( <i>Flp</i> recombined)           | 2724                              | CGA TCC CTG AAC ATG TCC ATC       |

**Supplementary Table 2:** Primary and secondary antibodies for immunofluorescent staining.

| <b>Primary Antibodies</b>          | <b>SOURCE</b>                        | <b>IDENTIFIER</b> | <b>DILUTION</b> |
|------------------------------------|--------------------------------------|-------------------|-----------------|
| α-GFP                              | Avēs Labs                            | GFP-1020          | 1:1000          |
| α-CK8                              | Developmental Studies Hybridoma Bank | TROMAI            | 1:100           |
| α-CK14                             | Covance                              | PRB-155P          | 1:1000          |
| α-E-cadherin                       | Cell Signaling                       | #3195             | 1:200           |
| α-N-cadherin                       | Cell Signaling                       | #14215            | 1:200           |
| pSTAT3                             | Cell Signaling                       | #9145S            | 1:100           |
| <b>Secondary Antibodies</b>        | <b>SOURCE</b>                        | <b>IDENTIFIER</b> | <b>Dilution</b> |
| Alexa Fluor 488 goat anti-chicken  | Invitrogen                           | A11039            | 1:1000          |
| Alexa Fluor 488 donkey anti-rat    | Invitrogen                           | A21208            | 1:1000          |
| Alexa Fluor 594 goat anti-rat      | Invitrogen                           | A11007            | 1:1000          |
| Alexa Fluor 594 goat anti-rabbit   | Invitrogen                           | A11012            | 1:1000          |
| Alexa Fluor 594 donkey anti-rabbit | Invitrogen                           | A21207            | 1:200-1000      |
| Alexa Fluor 488 donkey anti-rabbit | Invitrogen                           | A21206            | 1:1000          |
| Alexa Fluor 594 goat anti-mouse    | Invitrogen                           | A11005            | 1:1000          |

**Supplementary Table 3:** Primary and secondary antibodies for immunoblotting.

| <b>Primary Antibodies</b>       | <b>SOURCE</b>  | <b>IDENTIFIER</b> | <b>DILUTION</b> |
|---------------------------------|----------------|-------------------|-----------------|
| α-JAK1                          | Cell Signaling | #50996            | 1:1000          |
| α-pSTAT3                        | Cell Signaling | #9145S            | 1:1000          |
| α-STAT3                         | Cell Signaling | #9139             | 1:1000          |
| α-GAPDH                         | Cell Signaling | #5174S            | 1:2000          |
| <b>Secondary Antibodies</b>     | <b>SOURCE</b>  | <b>IDENTIFIER</b> | <b>DILUTION</b> |
| HRP-conjugated goat anti-rabbit | R&D Systems    | HAF008            | 1:2000          |
| Digital anti-Mouse-HRP          | KwikQuant      | R1005             | 1:2000          |

# Raw Images of PCR gels or Immunoblots

Figure 1C

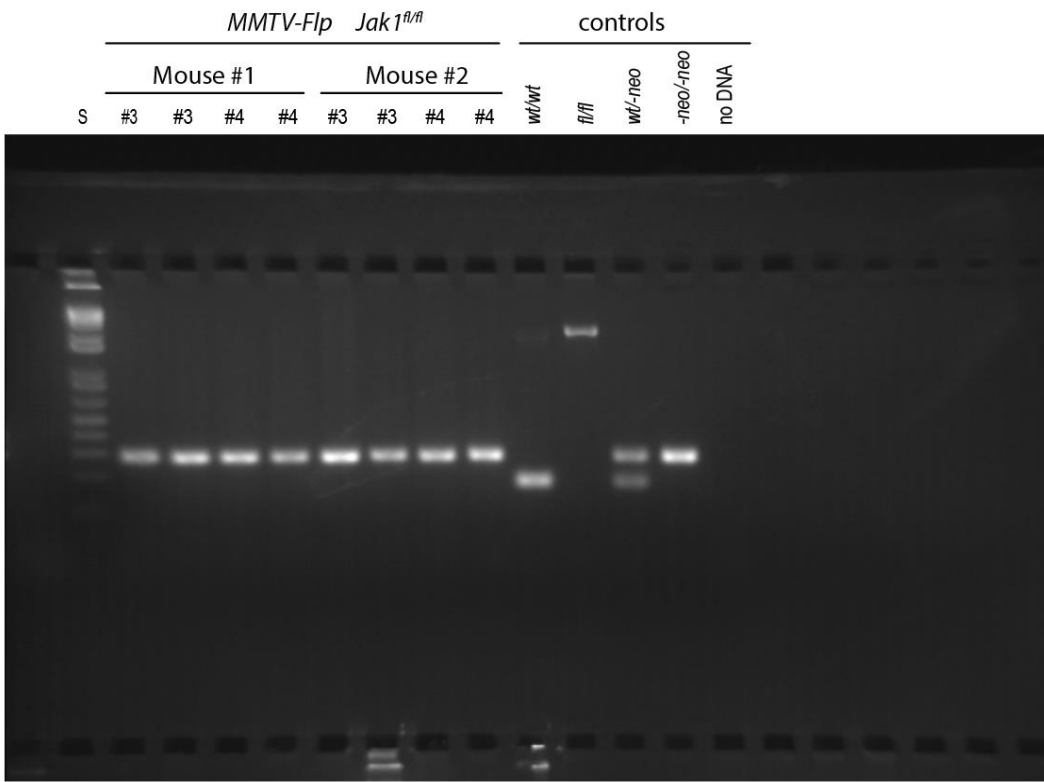

Figure 1D

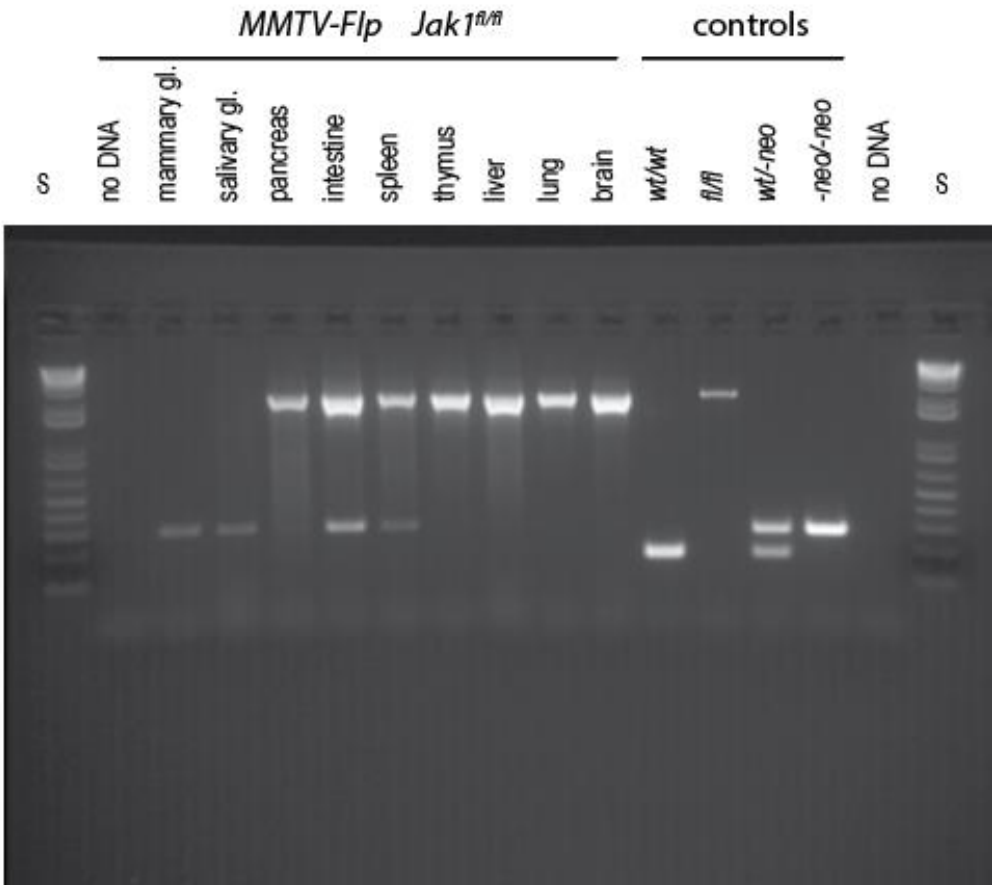

**Figure 7A**

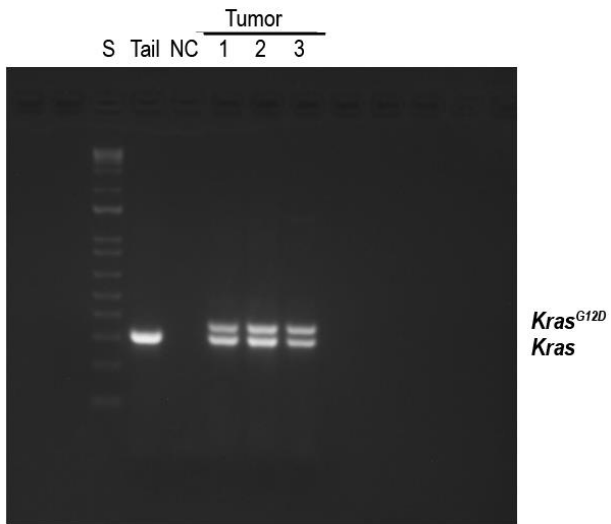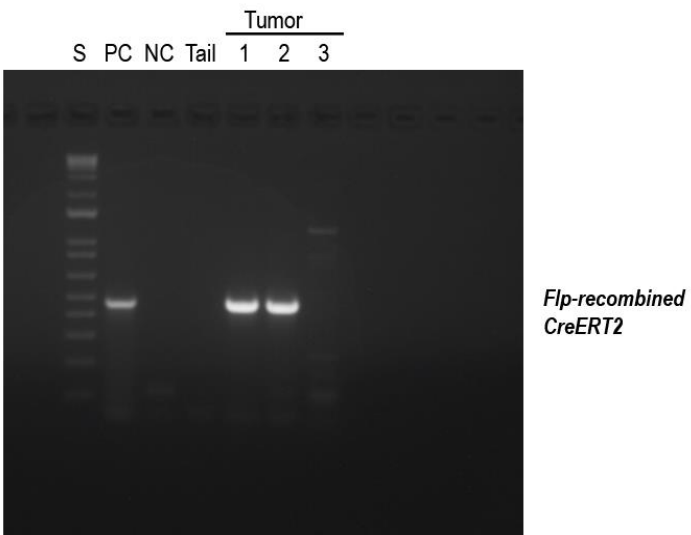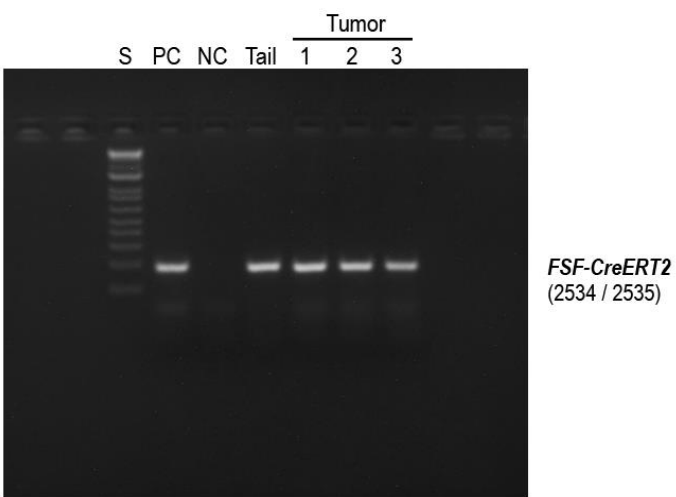

**Figure 7B**

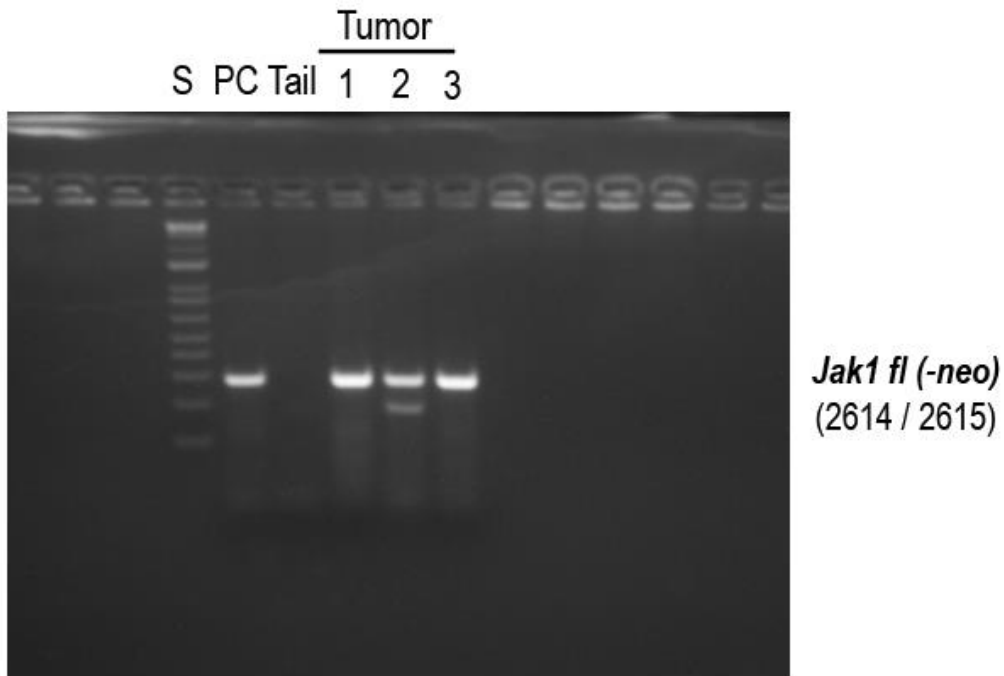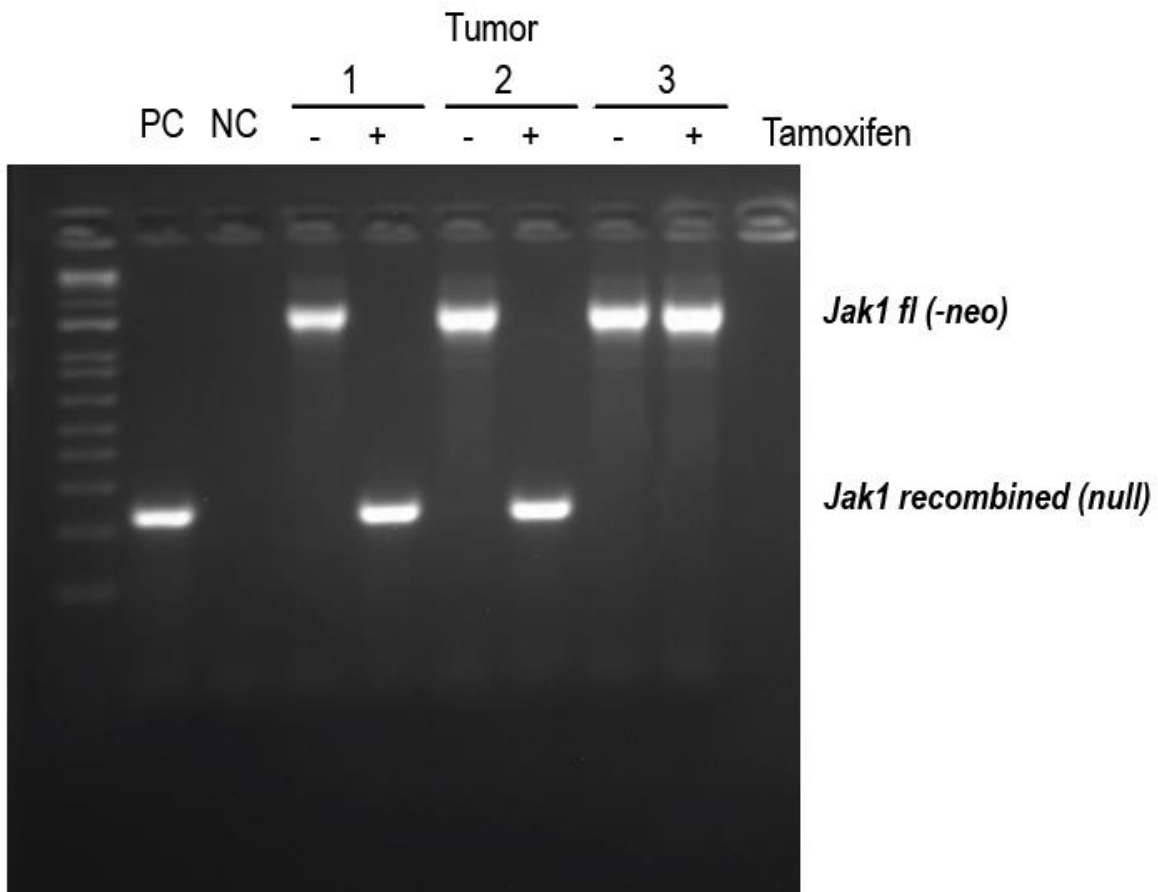

**Figure 7C**

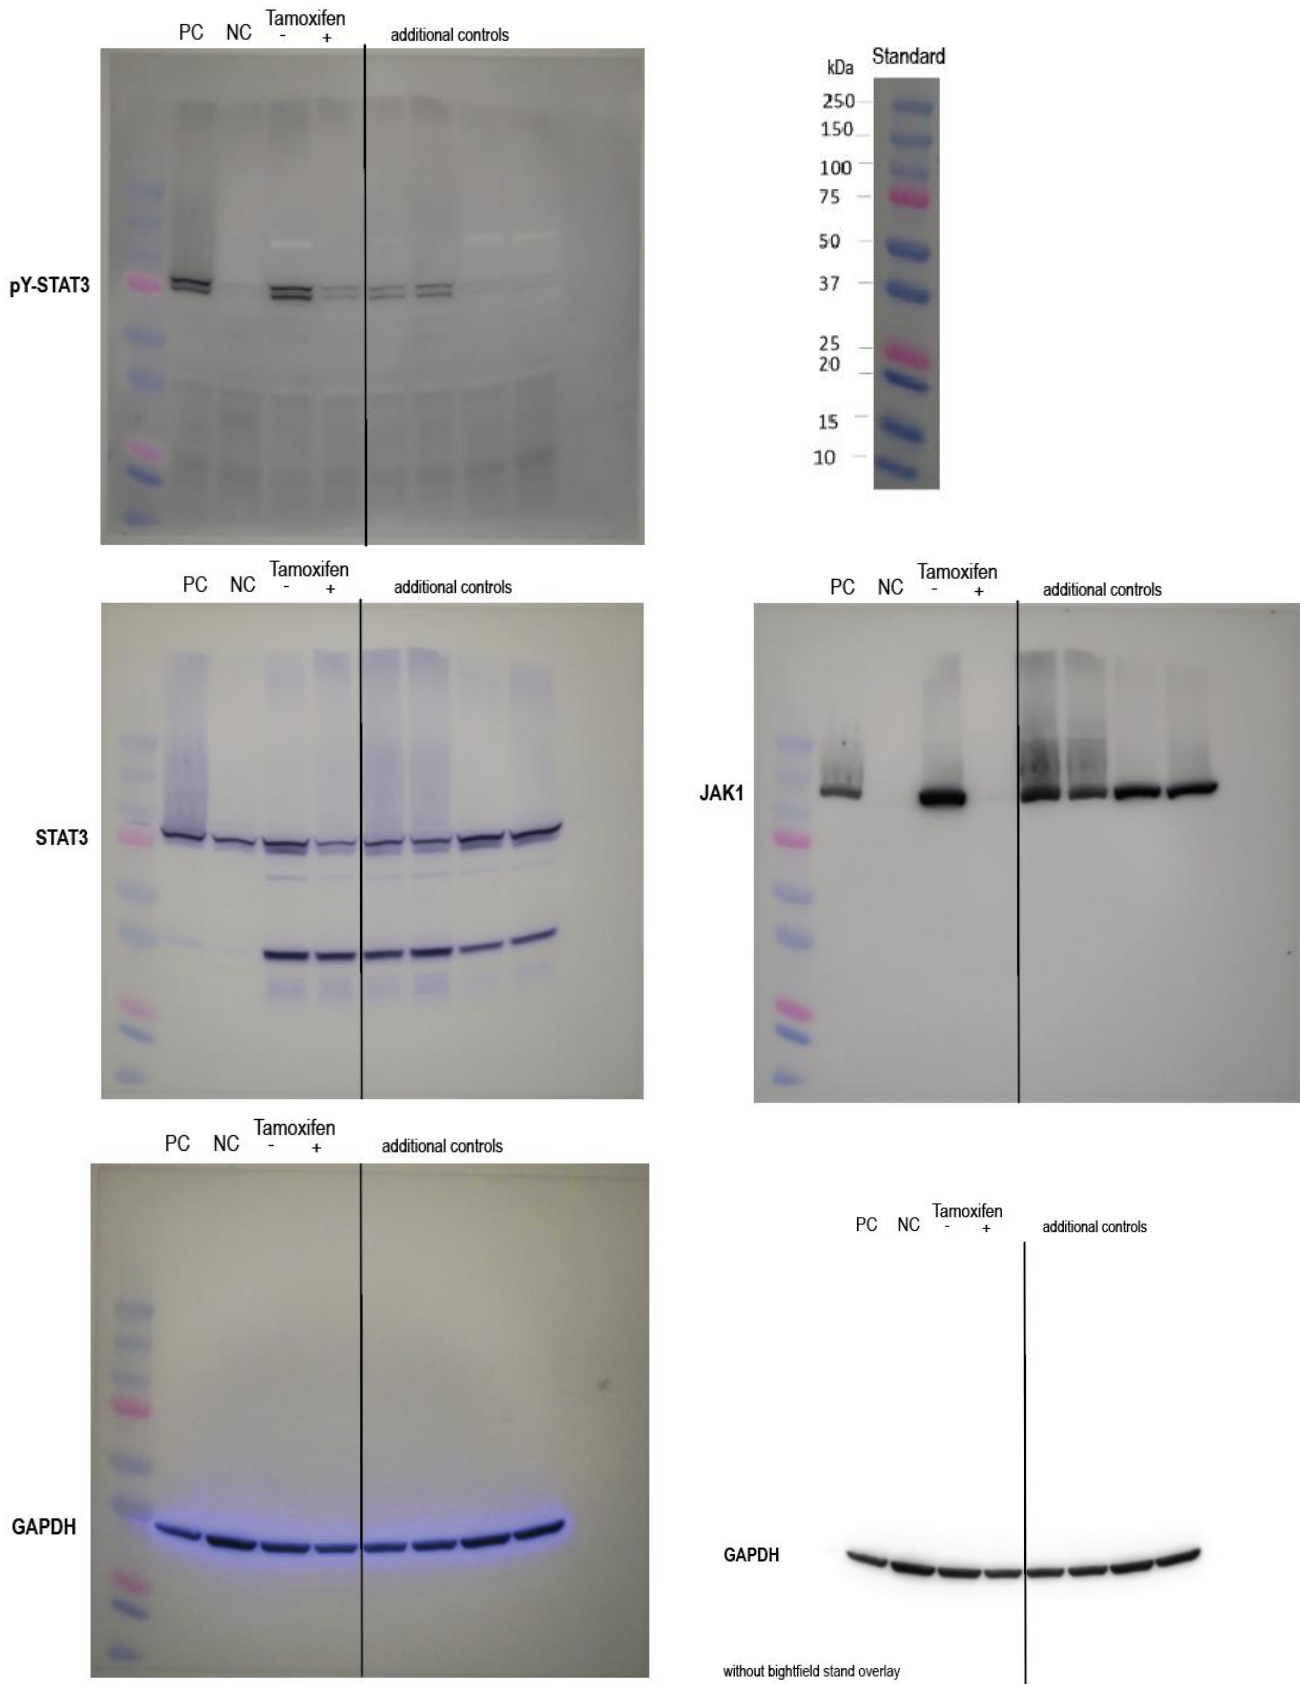

Supplement: 41598_2021_231_MOESM1_ESM.pdf [file 41598_2021_231_MOESM1_ESM.pdf]
